# Supplementary material
Source: PubMed Central journal article supplement (PMC2793040)
Supplement: JCO.2008.20.4156_1.pdf [file JCO.2008.20.4156_1.pdf]

## **Supplementary Appendix**

Supplement to: Treviño LR, Shimasaki N, Yang W, Panetta, et al. Germline genetic variation in an organic anion transporter polypeptide associated with methotrexate pharmacokinetics and clinical effects.

## Methods

**Genotyping calls and Imputations:** Genotype calls were made using the Bayesian Robust Linear Multichip with Mahalanobis Distance (BRLMM) algorithm. Associations between germline SNP genotypes and methotrexate clearance were evaluated using a linear regression model, treating genotype as a numeric variable (0=AA, 1=AB, and 2=BB). Missing genotypes were imputed using linkage disequilibrium (LD) between missing and typed SNPs in the appropriate race/ancestry groups for each patient, with LD patterns established using the HapMap data sets release 22, when LD was informative. However, if the imputed genotype was discordant with the direction of the raw intensity signals (e.g. if the raw data indicated AA or AB but not BB genotype, but LD patterns indicated BB genotype), then the genotype was not imputed but left as missing. If LD information was unavailable for a SNP with missing genotype, an intermediate value (0 to 1 or 1 to 2) for genotype was assigned based on the actual signal intensity distribution observed from the chip. We attempted imputation for all SNPs on the 500K SNPCHIP. In total, 0.91% of total genotypes involving 58% of SNPs were successfully imputed, i.e. initial “NoCall” were imputed as “AA”, “AB” or “BB” genotypes. Only 0.008% of all genotypes were left missing because of discordance between imputed genotypes and raw intensity signals. For all of the top 10 *SLCO1B1* SNPs listed in Table 1, the final call rate was greater than 98%. None of the *SLCO1B1* SNPs had genotypes that were left missing because of discordance between imputed genotypes and raw intensity signal values.

**Gene-level Analysis:** We performed a principal component analysis (PCA) using observed genotypes from all SNPs within the gene to account for the linkage disequilibrium among the SNPs. These derived genetic components from the PCA were uncorrelated with one another. We selected the top components (Supplemental table 11) that accounted for at least 95% of the genetic variation to be included in a multivariate analysis. The top two SNPs in the gene-level analysis, with the highest absolute value, were the same top-ranked SNPs in the single-SNP analysis. To test whether SNPs within a gene predict methotrexate clearance, we built multiple linear regression models using the derived genetic components as independent variables, and computed the r-squared test statistic as well as the Akaike's information criterion (AIC) for each gene. The AIC is a measure of the goodness-of-fit but also takes account of the number of predictors included in the model. To assess the overall significance of the gene, we performed  $1 \times 10^6$  permutations. In each permutation, we randomly assigned methotrexate clearance values to patients and let the genetic components remain constant as observed. Using the permuted methotrexate clearance values and the observed genetic components, we performed the same multiple linear regression model and computed the r-squared statistic. The proportion of permutations with r-squared values larger than or equal to the observed was assigned as the significance of the gene. By the above analysis, each gene had only one P value and AIC estimate (Supplemental table 7) thus avoiding the multiple testing caused by multiple SNPs within the gene.

**Ancestry and Race determination:** Genetically-determined race was assessed two ways: (1) using the percentage of ancestry (European, African, and Asian) for each patient, and (2) using the Eigenstrat method of principal component analysis. To estimate the percentage of ancestry for each patient, approximately 100,000 SNPs from the total possible 398,699 evaluable SNPs with a 100% genotyping call rate (which were also genotyped in the HapMap panels of African, Asian and European origin) were selected. We randomly selected 100 from the pool of 100,000 SNPs, and built a prediction model using a linear discriminant analysis based on the HapMap genotype data that distinguished individuals of African, Asian and European ancestry. We predicted the probability of a patient being of European descent, African descent and Asian descent based on the model. We repeated the above procedure 1000 times, and computed the average probability as the estimate of percent of European, African, or Asian ancestry for each patient; each patient had an estimated percentage of European ancestry, percentage of African ancestry, and percentage of Asian ancestry. We found that 5 patients had ancestral genotypes consistent with at least 90% Asian ancestry, 73 patients with at least 90% African-American ancestry, and 315 patients with at least 90% Caucasian ancestry. The remaining 41 patients were classified as “other.” There was good concordance (94%) between self-reported race and race classified by genotype data on the 500K SNPCHIP. We also used a principal component analysis for assessing racial composition based on the Eigenstrat method<sup>1</sup>.

**Standardization of non-genetic factors:** Hydration, alkalinization, dosing, and monitoring were standardized because all patients were prospectively studied on single-institution research protocols that used extensive infrastructure and protocol-specific standard orders (Supplemental table 2). Each course of high-dose methotrexate was accompanied by 2 pages of single-spaced, detailed instructions that included hydration fluids, IV rates, alkalinization with sodium bicarbonate, urine pH monitoring, instructions for further alkalinization, clinical chemistries, avoidance of interacting drugs, plasma monitoring of methotrexate concentrations, antiemetics, contingency plans for vomiting, low urine output or low urine pH and leucovorin rescue. All toxicity was monitored and reviewed at biweekly program meetings. All patients and families were interviewed by a clinical pharmacist and non-protocol supportive care was changed, if needed, to minimize drug interactions or other clinical features that might affect methotrexate clearance and risk for delayed excretion.

**Prospective grading of toxicity:** Toxicity was graded using the NCI CTEP guidelines (<http://ctep.cancer.gov>). All data including grade 3 and 4 toxicities were carefully summarized and reviewed by the principal investigator prior to submission to an external DSMB. These data were retrieved from established institutional databases and discussed in detail by both principal and co-investigators at protocol meetings held every two weeks. Although graded prospectively, the relationship between toxicities and SNP genotypes was

evaluated retrospectively, after results of the initial genotype vs. methotrexate clearance analysis were known.

**Supplemental table 1. Number of patients per treatment protocol; all have both SNP genotype and methotrexate clearance data available.**

| Protocol                                                   | Methotrexate dose              | No. of Courses | Discovery Cohort (n=434) |                                      | Validation Cohort (n = 206) |                                      |
|------------------------------------------------------------|--------------------------------|----------------|--------------------------|--------------------------------------|-----------------------------|--------------------------------------|
|                                                            |                                |                | SNPChip data (n= 434)    | Subset with T521C genotyping (n=387) | SNPChip data (n=206 )       | Subset with T521C genotyping (n=102) |
| Total XIIIB<br>1994 - 1998                                 | 2 g/m <sup>2</sup> /2 hours    | 10             | 213                      | 174                                  | 0                           | 0                                    |
| Total XV <sup>a</sup><br>low risk<br>2000 – 2007           | 2.5 g/m <sup>2</sup> /24 hours | 4              | 114                      | 110                                  | 97                          | 50                                   |
| Total XV <sup>a</sup><br>standard/high risk<br>2000 – 2007 | 5 g/m <sup>2</sup> /24 hours   | 4              | 107                      | 103                                  | 109                         | 52                                   |

<sup>a</sup>For Total XV, patients on the low risk arm and the standard/high risk arm had dosages individualized to achieve a steady state concentration of 33 µM or 65 µM respectively.

**Supplemental table 2. Details of methotrexate administration, hydration and alkalinization.**

|                                                                                        | <b>Total XIII B</b>                                                                              | <b>Total XV low risk</b>                                                                                                                                                              | <b>Total XV standard/high risk</b>                                                                                                                                                 |
|----------------------------------------------------------------------------------------|--------------------------------------------------------------------------------------------------|---------------------------------------------------------------------------------------------------------------------------------------------------------------------------------------|------------------------------------------------------------------------------------------------------------------------------------------------------------------------------------|
| Methotrexate dose                                                                      | 2000 mg/m <sup>2</sup> in 100 ml D <sub>5</sub> W IV over 2 hr                                   | *250 mg/m <sup>2</sup> over 1 hr then 2250 mg/m <sup>2</sup> /23 hr                                                                                                                   | **500 mg/m <sup>2</sup> over 1 hr then 4500 mg/m <sup>2</sup> /23 hr                                                                                                               |
| Hydration duration                                                                     | From at least 1 hr before methotrexate to ≥ 5 hr after methotrexate                              | From at least 2 hr before methotrexate to ≥ 42 hr after Methotrexate                                                                                                                  | From at least 2 hr before methotrexate to ≥ 42 hr after methotrexate                                                                                                               |
| Hydration rate                                                                         | 200 ml/m <sup>2</sup> /hr plus bolus of 12 mEq/m <sup>2</sup> NaHCO <sub>3</sub>                 | 100 ml/m <sup>2</sup> /hr if started night before methotrexate; if not, 200 ml/m <sup>2</sup> /hr x 2 hr + 25 mEq/m <sup>2</sup> NaHCO <sub>3</sub> , then 100 ml/m <sup>2</sup> /hr. | 125ml/m <sup>2</sup> /hr if started night before methotrexate; if not, 200 ml/m <sup>2</sup> /hr x 2 hr+ 25 mEq/m <sup>2</sup> NaHCO <sub>3</sub> , then 125 ml/m <sup>2</sup> /hr |
| Hydration fluid                                                                        | D <sub>5</sub> W ¼ NS<br>NaHCO <sub>3</sub> 40 mEq/L                                             | D <sub>5</sub> W + KCl 20 mEq/L +<br>NaHCO <sub>3</sub> 40 mEq/L                                                                                                                      | D <sub>5</sub> W + KCl 20 mEq/L +<br>NaHCO <sub>3</sub> 40 mEq/L                                                                                                                   |
| Urine pH = 6.0<br>Urine pH < 6.0                                                       | Give NaHCO <sub>3</sub> 12.5 mEq/m <sup>2</sup><br>Give NaHCO <sub>3</sub> 25 mEq/m <sup>2</sup> | Give NaHCO <sub>3</sub> 12.5 mEq/m <sup>2</sup><br>Give NaHCO <sub>3</sub> 25 mEq/m <sup>2</sup>                                                                                      | Give NaHCO <sub>3</sub> 12.5 mEq/m <sup>2</sup><br>Give NaHCO <sub>3</sub> 25 mEq/m <sup>2</sup>                                                                                   |
| Plasma for methotrexate at:                                                            | Pre, 1,6,21 & 44 hr from start                                                                   | Pre, 6, 23 & 42 hr from start                                                                                                                                                         | Pre, 6, 23 & 42 hr from start                                                                                                                                                      |
| Baseline leucovorin (dose is increased from baseline for elevated plasma methotrexate) | 10 mg/m <sup>2</sup> q6 hr x 5 to start at 44 hr                                                 | 10 mg/m <sup>2</sup> /dose q6 hr x 5 to start at 42 hr                                                                                                                                | 15 mg/m <sup>2</sup> /dose q6 hr x 5 start at 42 hr                                                                                                                                |

\*doses individualized to achieve a plasma steady state methotrexate concentration of 33µM

\*\* doses individualized to achieve a plasma steady state methotrexate concentration of 65µM



**Supplemental table 3. SNPs associated with average methotrexate clearance in the discovery set of 434 children with ALL.**

| dbSNP ID   | Chr.  | Alleles (A/B) | P value <sup>a</sup>   | Eigenstrat P value <sup>b</sup> | MAF  | Gene symbol      |
|------------|-------|---------------|------------------------|---------------------------------|------|------------------|
| rs11045879 | chr12 | *T/C          | 1.7X 10 <sup>-10</sup> | 1.6 X 10 <sup>-10</sup>         | 0.16 | <i>SLCO1B1</i>   |
| rs4149081  | chr12 | *G/A          | 1.7X 10 <sup>-9</sup>  | 4.0 X 10 <sup>-9</sup>          | 0.16 | <i>SLCO1B1</i>   |
| rs16923647 | chr12 | T/C*          | 3.64X 10 <sup>-6</sup> | 3.64 X 10 <sup>-6</sup>         | 0.13 | <i>SLCO1A2</i>   |
| rs12576286 | chr11 | A/T*          | 1.52X 10 <sup>-5</sup> | 7.16 X 10 <sup>-6</sup>         | 0.02 | <i>SOX6</i>      |
| rs3737416  | chr21 | *C/T          | 1.76X 10 <sup>-5</sup> | 1.75 X 10 <sup>-5</sup>         | 0.05 | <i>APP</i>       |
| rs8065836  | chr17 | A/G*          | 2.27X 10 <sup>-5</sup> | 1.36 X 10 <sup>-5</sup>         | 0.45 | <i>TNFRSF13B</i> |
| rs17781156 | chr14 | T/C*          | 2.28X 10 <sup>-5</sup> | 2.83 X 10 <sup>-5</sup>         | 0.5  |                  |
| rs4338756  | chr15 | A/C*          | 2.57X 10 <sup>-5</sup> | 7.97 X 10 <sup>-6</sup>         | 0.14 |                  |
| rs7912575  | chr10 | G/A*          | 2.64X 10 <sup>-5</sup> | 5.32 X 10 <sup>-6</sup>         | 0.02 | <i>NRG3</i>      |
| rs468522   | chr21 | *G/A          | 2.80X 10 <sup>-5</sup> | 1.92 X 10 <sup>-5</sup>         | 0.16 |                  |
| rs12523702 | chr6  | C/T*          | 3.81X 10 <sup>-5</sup> | 2.79 X 10 <sup>-5</sup>         | 0.37 |                  |
| rs869532   | chr8  | *A/C          | 3.85X 10 <sup>-5</sup> | 2.01 X 10 <sup>-5</sup>         | 0.04 |                  |
| rs128647   | chr21 | *G/A          | 3.91X 10 <sup>-5</sup> | 3.87 X 10 <sup>-5</sup>         | 0.04 | <i>APP</i>       |
| rs12894524 | chr14 | *T/G          | 3.92X 10 <sup>-5</sup> | 1.31 X 10 <sup>-4</sup>         | 0.38 | <i>MYH7</i>      |
| rs7040439  | chr9  | T/A*          | 4.06X 10 <sup>-5</sup> | 3.27 X 10 <sup>-5</sup>         | 0.05 |                  |
| rs468969   | chr21 | *A/G          | 4.22X 10 <sup>-5</sup> | 2.55 X 10 <sup>-5</sup>         | 0.16 |                  |
| rs4324007  | chr13 | *A/T          | 4.77X 10 <sup>-5</sup> | 6.22 X 10 <sup>-5</sup>         | 0.31 | <i>GPC5</i>      |
| rs2881582  | chr15 | *T/C          | 5.97X 10 <sup>-5</sup> | 1.91 X 10 <sup>-5</sup>         | 0.18 | <i>AGBL1</i>     |
| rs17089780 | chr4  | *C/T          | 5.98X 10 <sup>-5</sup> | 3.47 X 10 <sup>-4</sup>         | 0.02 |                  |
| rs6448167  | chr4  | G/C*          | 6.00X 10 <sup>-5</sup> | 2.22 X 10 <sup>-5</sup>         | 0.05 |                  |
| rs17502069 | chr18 | A/T*          | 6.27X 10 <sup>-5</sup> | 4.25 X 10 <sup>-5</sup>         | 0.14 | <i>L3MBTL4</i>   |
| rs1863603  | chr2  | G/A*          | 6.92X 10 <sup>-5</sup> | 6.26 X 10 <sup>-5</sup>         | 0.21 |                  |
| rs7704890  | chr5  | T/C*          | 7.06X 10 <sup>-5</sup> | 5.24 X 10 <sup>-5</sup>         | 0.35 | <i>MAST4</i>     |
| rs16924862 | chr11 | *A/G          | 7.18X 10 <sup>-5</sup> | 4.83 X 10 <sup>-5</sup>         | 0.02 | <i>SOX6</i>      |
| rs16829700 | chr3  | *G/A          | 8.43X 10 <sup>-5</sup> | 1.21 X 10 <sup>-4</sup>         | 0.06 | <i>CDGAP</i>     |
| rs960390   | chr21 | T/G*          | 9.12X 10 <sup>-5</sup> | 4.0 X 10 <sup>-4</sup>          | 0.34 |                  |
| rs7568533  | chr2  | A/C*          | 9.24X 10 <sup>-5</sup> | 9.65 X 10 <sup>-5</sup>         | 0.21 |                  |
| rs1887365  | chr4  | *C/G          | 9.28X 10 <sup>-5</sup> | 2.23 X 10 <sup>-4</sup>         | 0.17 | <i>ZFYVE28</i>   |
| rs2754163  | chr14 | T/C*          | 9.31X 10 <sup>-5</sup> | 1.12 X 10 <sup>-4</sup>         | 0.32 | <i>MYH7</i>      |
| rs4129601  | chr11 | G/A*          | 9.63X 10 <sup>-5</sup> | 5.44 X 10 <sup>-5</sup>         | 0.03 |                  |
| rs529270   | chr11 | *T/G          | 9.75X 10 <sup>-5</sup> | 5.65 X 10 <sup>-5</sup>         | 0.06 | <i>STX3</i>      |
| rs3758729  | chr11 | *C/T          | 9.76X 10 <sup>-5</sup> | 7.64 X 10 <sup>-5</sup>         | 0.46 | <i>PRDM11</i>    |
| rs3829767  | chr14 | *G/A          | 1.01X 10 <sup>-5</sup> | 7.33 X 10 <sup>-5</sup>         | 0.16 | <i>SYNE2</i>     |
| rs6966641  | chr7  | G/A*          | 1.03X 10 <sup>-5</sup> | 8.17 X 10 <sup>-5</sup>         | 0.43 |                  |
| rs4722283  | chr7  | *G/C          | 1.03X 10 <sup>-4</sup> | 8.45 X 10 <sup>-5</sup>         | 0.43 |                  |
| rs2057200  | chr14 | *G/A          | 1.04X 10 <sup>-4</sup> | 1.60 X 10 <sup>-4</sup>         | 0.05 |                  |
| rs9845965  | chr3  | *T/G          | 1.07X 10 <sup>-4</sup> | 1.51 X 10 <sup>-4</sup>         | 0.07 | <i>CDGAP</i>     |
| rs4020077  | chr2  | *A/G          | 1.08X 10 <sup>-4</sup> | 1.04 X 10 <sup>-4</sup>         | 0.08 |                  |
| rs17196492 | chr13 | T/C*          | 1.09X 10 <sup>-4</sup> | 3.65 X 10 <sup>-4</sup>         | 0.07 |                  |
| rs1317057  | chr7  | A/G*          | 1.10X 10 <sup>-4</sup> | 4.88 X 10 <sup>-5</sup>         | 0.24 | <i>EXOC4</i>     |
| rs309043   | chr12 | *T/G          | 1.13X 10 <sup>-4</sup> | 1.73 X 10 <sup>-4</sup>         | 0.35 |                  |

|            |       |      |                        |                         |      |                 |
|------------|-------|------|------------------------|-------------------------|------|-----------------|
| rs17564624 | chr5  | G/A* | 1.17X 10 <sup>-4</sup> | 1.87 X 10 <sup>-4</sup> | 0.04 | <i>KCNIP1</i>   |
| rs11645471 | chr16 | *A/T | 1.19X 10 <sup>-4</sup> | 3.01 X 10 <sup>-4</sup> | 0.03 | <i>NKD1</i>     |
| rs11138867 | chr9  | G/A* | 1.20X 10 <sup>-4</sup> | 9.3 X 10 <sup>-5</sup>  | 0.04 |                 |
| rs2824008  | chr21 | T/C* | 1.25X 10 <sup>-4</sup> | 3.17 X 10 <sup>-4</sup> | 0.34 |                 |
| rs1255971  | chr14 | T/G* | 1.27X 10 <sup>-4</sup> | 9.2 X 10 <sup>-5</sup>  | 0.15 | <i>SYNE2</i>    |
| rs7036018  | chr9  | T/C* | 1.28X 10 <sup>-4</sup> | 1.79 X 10 <sup>-4</sup> | 0.14 | <i>SLC24A2</i>  |
| rs10743623 | chr12 | A/G* | 1.29X 10 <sup>-4</sup> | 1.84 X 10 <sup>-4</sup> | 0.4  |                 |
| rs10740455 | chr10 | *T/A | 1.31X 10 <sup>-4</sup> | 1.26 X 10 <sup>-4</sup> | 0.11 | <i>C10orf11</i> |
| rs10841753 | chr12 | T/C* | 1.34X 10 <sup>-4</sup> | 1.52 X 10 <sup>-4</sup> | 0.19 | <i>SLCO1B1</i>  |

Shown is the dbSNP ID, chromosome, SNP alleles, P value of association between the listed SNP and methotrexate clearance, the minor allele frequency in the discovery set (n=434) and the gene symbol annotated to the listed SNP.

\*Alleles denoted with an asterisk have higher methotrexate clearance.

<sup>a</sup> The P value shown represents the evidence of association between the polymorphisms and methotrexate clearance, adjusting for age, treatment regimen and race assessed as the percentage of an individual's ancestry (percentage European, percentage African and percentage Asian) as covariates.

<sup>b</sup> The P value shown represents the evidence of association between the polymorphisms and methotrexate clearance, adjusting for age, treatment regimen and race assessed using principal components, as described by Eigentstat.<sup>1</sup>

**Supplemental table 4. SNPs associated with methotrexate clearance (in a linear mixed effects model, retaining clearance data for each course) in the discovery cohort of 434 children with ALL.**

| dbSNP ID   | Chr.  | Alleles (A/B) | P value                 | MAF  | Gene symbol      |
|------------|-------|---------------|-------------------------|------|------------------|
| rs11045879 | chr12 | *T/C          | 9.55X 10 <sup>-11</sup> | 0.16 | <i>SLCO1B1</i>   |
| rs4149081  | chr12 | *G/A          | 6.80X 10 <sup>-9</sup>  | 0.16 | <i>SLCO1B1</i>   |
| rs16923647 | chr12 | T/C*          | 1.30X 10 <sup>-6</sup>  | 0.13 | <i>SLCO1A2</i>   |
| rs3737416  | chr21 | *C/T          | 9.05X 10 <sup>-6</sup>  | 0.05 | <i>APP</i>       |
| rs12576286 | chr11 | A/T*          | 9.06X 10 <sup>-6</sup>  | 0.02 | <i>SOX6</i>      |
| rs7912575  | chr10 | G/A*          | 1.72X 10 <sup>-5</sup>  | 0.02 | <i>NRG3</i>      |
| rs17781156 | chr14 | T/C*          | 1.84X 10 <sup>-5</sup>  | 0.5  |                  |
| rs4324007  | chr13 | *A/T          | 2.13X 10 <sup>-5</sup>  | 0.31 | <i>GPC5</i>      |
| rs128647   | chr21 | *G/A          | 2.14X 10 <sup>-5</sup>  | 0.04 | <i>APP</i>       |
| rs468522   | chr21 | *G/A          | 2.46X 10 <sup>-5</sup>  | 0.16 |                  |
| rs12894524 | chr14 | *T/G          | 3.04X 10 <sup>-5</sup>  | 0.38 | <i>MYH7</i>      |
| rs869532   | chr8  | *A/C          | 3.13X 10 <sup>-5</sup>  | 0.04 |                  |
| rs4338756  | chr15 | A/C*          | 3.22X 10 <sup>-5</sup>  | 0.14 |                  |
| rs8065836  | chr17 | A/G*          | 3.58X 10 <sup>-5</sup>  | 0.45 | <i>TNFRSF13B</i> |
| rs468969   | chr21 | *A/G          | 3.77X 10 <sup>-5</sup>  | 0.16 |                  |
| rs6448167  | chr4  | G/C*          | 3.84X 10 <sup>-5</sup>  | 0.05 |                  |
| rs2881582  | chr15 | *T/C          | 3.98X 10 <sup>-5</sup>  | 0.18 | <i>AGBL1</i>     |
| rs1317057  | chr7  | A/G*          | 4.04X 10 <sup>-5</sup>  | 0.24 | <i>EXOC4</i>     |
| rs16924862 | chr11 | *A/G          | 4.05X 10 <sup>-5</sup>  | 0.02 | <i>SOX6</i>      |
| rs4020077  | chr2  | *A/G          | 4.07X 10 <sup>-5</sup>  | 0.08 |                  |
| rs16829700 | chr3  | *G/A          | 4.43X 10 <sup>-5</sup>  | 0.06 | <i>CDGAP</i>     |
| rs878815   | chr14 | *G/A          | 5.42X 10 <sup>-5</sup>  | 0.4  |                  |
| rs9845965  | chr3  | T/G*          | 5.60X 10 <sup>-5</sup>  | 0.07 | <i>CDGAP</i>     |
| rs17089780 | chr4  | *C/T          | 5.71X 10 <sup>-5</sup>  | 0.02 |                  |
| rs12997105 | chr2  | G/C*          | 5.71X 10 <sup>-5</sup>  | 0.08 |                  |
| rs17502069 | chr18 | A/T*          | 5.95X 10 <sup>-5</sup>  | 0.14 | <i>L3MBTL4</i>   |
| rs4832104  | chr2  | *C/A          | 6.29X 10 <sup>-5</sup>  | 0.08 |                  |
| rs7040439  | chr9  | T/A*          | 6.48X 10 <sup>-5</sup>  | 0.05 |                  |
| rs7704890  | chr5  | T/C*          | 6.70X 10 <sup>-5</sup>  | 0.35 | <i>MAST4</i>     |
| rs1887365  | chr4  | *C/G          | 6.70X 10 <sup>-5</sup>  | 0.17 | <i>ZFYVE28</i>   |
| rs4129601  | chr11 | G/A*          | 6.87X 10 <sup>-5</sup>  | 0.03 |                  |
| rs12523702 | chr6  | C/T*          | 6.94X 10 <sup>-5</sup>  | 0.37 |                  |
| rs7036018  | chr9  | *T/C          | 8.10X 10 <sup>-5</sup>  | 0.14 | <i>SLC24A2</i>   |
| rs10841753 | chr12 | T/C*          | 8.14X 10 <sup>-5</sup>  | 0.19 | <i>SLCO1B1</i>   |
| rs3829767  | chr14 | *G/A          | 8.46X 10 <sup>-5</sup>  | 0.16 | <i>SYNE2</i>     |
| rs10743623 | chr12 | A/G*          | 8.47X 10 <sup>-5</sup>  | 0.4  |                  |
| rs309043   | chr12 | *T/G          | 8.87X 10 <sup>-5</sup>  | 0.35 |                  |
| rs1625289  | chr21 | *G/C          | 9.10X 10 <sup>-5</sup>  | 0.05 | <i>APP</i>       |
| rs17564624 | chr5  | G/A*          | 9.11X 10 <sup>-5</sup>  | 0.04 | <i>KCNIP1</i>    |
| rs6847225  | chr4  | T/A*          | 9.26X 10 <sup>-5</sup>  | 0.47 | <i>UCHL1</i>     |
| rs7746263  | chr6  | G/C*          | 9.29X 10 <sup>-5</sup>  | 0.03 |                  |
| rs10210186 | chr2  | T/C*          | 9.50X 10 <sup>-5</sup>  | 0.08 |                  |
| rs2754163  | chr14 | T/C*          | 9.63X 10 <sup>-5</sup>  | 0.32 | <i>MYH7</i>      |
| rs184649   | chr18 | G/A*          | 9.82X 10 <sup>-5</sup>  | 0.19 |                  |

|            |       |      |                        |      |
|------------|-------|------|------------------------|------|
| rs6027462  | chr20 | A/G* | 1.01X 10 <sup>-4</sup> | 0.22 |
| rs17615623 | chr19 | *C/A | 1.06X 10 <sup>-4</sup> | 0.15 |
| rs6966641  | chr7  | G/A* | 1.11X 10 <sup>-4</sup> | 0.43 |
| rs1990763  | chr19 | *A/G | 1.11X 10 <sup>-4</sup> | 0.16 |
| rs11126970 | chr2  | *G/A | 1.11X 10 <sup>-4</sup> | 0.08 |
| rs17125091 | chr14 | *A/T | 1.12X 10 <sup>-4</sup> | 0.21 |

---

Shown is the dbSNP ID, chromosome, SNP alleles, P value of association between the listed SNP and methotrexate clearance, the minor allele frequency in the discovery set (n=434) and the gene symbol annotated to the listed SNP.

\*Alleles denoted with an asterisk have higher methotrexate clearance.

**Supplemental table 5. SNPs associated with methotrexate clearance in the combined (discovery plus validation) cohort of 640 children with ALL.**

| dbSNP ID   | Chr   | Alleles (A/B) | P value                  | Eigenstrat P value      | MAF  | Gene symbol |
|------------|-------|---------------|--------------------------|-------------------------|------|-------------|
| rs11045879 | chr12 | T/C*          | 7.64 X 10 <sup>-11</sup> | 1.3 X 10 <sup>-10</sup> | 0.16 | SLCO1B1     |
| rs4149081  | chr12 | G/A*          | 1.47 X 10 <sup>-9</sup>  | 2.2 X 10 <sup>-9</sup>  | 0.16 | SLCO1B1     |
| rs11045818 | chr12 | A/G*          | 6.73 X 10 <sup>-7</sup>  | 1.1 X 10 <sup>-5</sup>  | 0.13 | SLCO1B1     |
| rs16923647 | chr12 | *T/C          | 1.59 X 10 <sup>-6</sup>  | 7.8 X 10 <sup>-5</sup>  | 0.10 | SLCO1A2     |
| rs10740455 | chr10 | T/A*          | 6.77 X 10 <sup>-6</sup>  | 9.8 X 10 <sup>-6</sup>  | 0.08 | C10orf11    |
| rs10841753 | chr12 | * T/C         | 6.93 X 10 <sup>-6</sup>  | 1.2 X 10 <sup>-5</sup>  | 0.19 | SLCO1B1     |
| rs16951021 | chr16 | C/T*          | 9.02 X 10 <sup>-6</sup>  | 3.2 X 10 <sup>-7</sup>  | 0.01 |             |
| rs6543610  | chr2  | G/C*          | 9.95 X 10 <sup>-6</sup>  | 1.4 X 10 <sup>-7</sup>  | 0.02 |             |
| rs16924862 | chr11 | *A/G          | 1.02 X 10 <sup>-5</sup>  | 3.1 X 10 <sup>-5</sup>  | 0.04 | SOX6        |
| rs7742587  | chr6  | T/C*          | 1.1 X 10 <sup>-5</sup>   | 2.8 X 10 <sup>-7</sup>  | 0.02 |             |
| rs4129601  | chr11 | G/A*          | 1.54 X 10 <sup>-5</sup>  | 2.3 X 10 <sup>-6</sup>  | 0.03 |             |
| rs6570465  | chr6  | T/C*          | 1.63 X 10 <sup>-5</sup>  | 3.9 X 10 <sup>-7</sup>  | 0.02 |             |
| rs12469413 | chr2  | *A/G          | 1.87 X 10 <sup>-5</sup>  | 5.9 X 10 <sup>-5</sup>  | 0.22 |             |
| rs2763993  | chr6  | T/C*          | 1.97 X 10 <sup>-5</sup>  | 2.9 X 10 <sup>-4</sup>  | 0.15 | PACRG       |
| rs6476012  | chr9  | G/A*          | 2.06 X 10 <sup>-5</sup>  | 1.0 X 10 <sup>-4</sup>  | 0.38 |             |
| rs495524   | chr1  | *T/A          | 2.17 X 10 <sup>-5</sup>  | 1.5 X 10 <sup>-6</sup>  | 0.42 |             |
| rs7312122  | chr12 | *G/A          | 2.28 X 10 <sup>-5</sup>  | 8.4 X 10 <sup>-6</sup>  | 0.16 |             |
| rs404801   | chr3  | A/C*          | 2.36 X 10 <sup>-5</sup>  | 5.3 X 10 <sup>-5</sup>  | 0.45 |             |
| rs903428   | chr15 | C/G*          | 2.46 X 10 <sup>-5</sup>  | 1.9 X 10 <sup>-5</sup>  | 0.33 |             |
| rs16842994 | chr2  | *C/G          | 2.55 X 10 <sup>-5</sup>  | 1.6 X 10 <sup>-6</sup>  | 0.02 |             |
| rs12576286 | chr11 | A/T*          | 2.67 X 10 <sup>-5</sup>  | 3.5 X 10 <sup>-4</sup>  | 0.03 | SOX6        |
| rs276000   | chr12 | *C/T          | 3.06 X 10 <sup>-5</sup>  | 7.2 X 10 <sup>-7</sup>  | 0.02 |             |
| rs564816   | chr9  | A/C*          | 3.07 X 10 <sup>-5</sup>  | 2.7 X 10 <sup>-7</sup>  | 0.04 | GLIS3       |
| rs4681523  | chr3  | *A/G          | 3.09 X 10 <sup>-5</sup>  | 6 X 10 <sup>-5</sup>    | 0.08 | WWTR1       |
| rs11045872 | chr12 | *A/G          | 3.34 X 10 <sup>-5</sup>  | 2.6 X 10 <sup>-4</sup>  | 0.15 | SLCO1B1     |
| rs7568533  | chr2  | *A/C          | 3.53 X 10 <sup>-5</sup>  | 1.1 X 10 <sup>-4</sup>  | 0.22 |             |
| rs1863603  | chr2  | *G/A          | 3.54 X 10 <sup>-5</sup>  | 1.0 X 10 <sup>-4</sup>  | 0.22 |             |
| rs17017982 | chr4  | *A/G          | 3.98 X 10 <sup>-5</sup>  | 5.4 X 10 <sup>-4</sup>  | 0.01 |             |
| rs17781156 | chr14 | *T/C          | 4.39 X 10 <sup>-5</sup>  | 2.4 X 10 <sup>-5</sup>  | 0.50 |             |
| rs350585   | chr3  | T/C*          | 4.55 X 10 <sup>-5</sup>  | 1.2 X 10 <sup>-4</sup>  | 0.45 |             |
| rs1396293  | chr3  | T/G*          | 4.59 X 10 <sup>-5</sup>  | 2 X 10 <sup>-5</sup>    | 0.24 |             |
| rs6873545  | chr5  | T/C*          | 4.69 X 10 <sup>-5</sup>  | 9.9 X 10 <sup>-4</sup>  | 0.30 | GHR         |
| rs10495048 | chr1  | *C/T          | 4.94 X 10 <sup>-5</sup>  | 1.6 X 10 <sup>-4</sup>  | 0.26 |             |
| rs7704890  | chr5  | *T/C          | 5.17 X 10 <sup>-5</sup>  | 1.1 X 10 <sup>-5</sup>  | 0.33 | MAST4       |
| rs4145130  | chr6  | T/A*          | 5.21 X 10 <sup>-5</sup>  | 1.2 X 10 <sup>-7</sup>  | 0.06 |             |
| rs4339926  | chr1  | A/G*          | 5.37 X 10 <sup>-5</sup>  | 1.1 X 10 <sup>-4</sup>  | 0.26 |             |
| rs7523455  | chr1  | G/A*          | 5.53 X 10 <sup>-5</sup>  | 1.5 X 10 <sup>-7</sup>  | 0.19 |             |
| rs468522   | chr21 | G/A*          | 5.63 X 10 <sup>-5</sup>  | 1.5 X 10 <sup>-4</sup>  | 0.14 |             |
| rs2479768  | chr13 | *G/A          | 5.72 X 10 <sup>-5</sup>  | 5.5 X 10 <sup>-6</sup>  | 0.03 | KIAA0774    |
| rs4387258  | chr10 | A/G*          | 5.77 X 10 <sup>-5</sup>  | 3.5 X 10 <sup>-6</sup>  | 0.14 |             |
| rs16862426 | chr1  | T/C*          | 5.88 X 10 <sup>-5</sup>  | 8.5 X 10 <sup>-8</sup>  | 0.03 |             |
| rs6448167  | chr4  | *G/C          | 6.04 X 10 <sup>-5</sup>  | 0.008                   | 0.07 |             |
| rs16904316 | chr8  | T/C*          | 6.13 X 10 <sup>-5</sup>  | 1.6 X 10 <sup>-6</sup>  | 0.03 |             |
| rs11166411 | chr1  | *C/T          | 6.23 X 10 <sup>-5</sup>  | 3.8 X 10 <sup>-5</sup>  | 0.11 | LRRC39      |

|            |       |      |                         |                        |      |         |
|------------|-------|------|-------------------------|------------------------|------|---------|
| rs4324007  | chr13 | A/T* | 6.91 X 10 <sup>-5</sup> | 8.3 X 10 <sup>-5</sup> | 0.31 | GPC5    |
| rs8004448  | chr14 | *A/G | 6.91 X 10 <sup>-5</sup> | 0.002                  | 0.36 |         |
| rs17032807 | chr4  | T/C* | 7.62 X 10 <sup>-5</sup> | 5.3 X 10 <sup>-5</sup> | 0.07 |         |
| rs7036018  | chr9  | T/C* | 7.81 X 10 <sup>-5</sup> | 7.7 X 10 <sup>-5</sup> | 0.12 | SLC24A2 |
| rs12595731 | chr15 | G/A* | 7.95 X 10 <sup>-5</sup> | 3.3 X 10 <sup>-5</sup> | 0.13 |         |

Shown is the dbSNP ID, chromosome, SNP alleles, P value of association between the listed SNP and methotrexate clearance, the minor allele frequency in the combined patient cohort (n=640) and the gene symbol annotated to the listed SNP.

\*Alleles denoted with an asterisk have higher methotrexate clearance.

<sup>a</sup> The P value shown represents the evidence of association between the polymorphisms and methotrexate clearance, adjusting for age, treatment regimen and race assessed as the percentage of an individual's ancestry (percentage European, percentage African and percentage Asian) as covariates.

<sup>b</sup> The P value shown represents the evidence of association between the polymorphisms and methotrexate clearance, adjusting for age, treatment regimen and race assessed using principal components, as described by Eigentstat.<sup>1</sup>

Supplemental table 6. Results from a linear mixed effects model in the combined patient cohort (n=559 patients with creatinine measurements) including course number and creatinine as a covariates.

|                                       |                        | <b>Coefficient</b> | <b>P value</b>          | <b>Percentage of interpatient variability</b> | <b>Percentage of inpatient variability</b> |
|---------------------------------------|------------------------|--------------------|-------------------------|-----------------------------------------------|--------------------------------------------|
| <b>Race<sup>a</sup></b>               |                        |                    |                         | 2.10 %                                        | 0%                                         |
|                                       | European               | *                  |                         |                                               |                                            |
|                                       | African                | 11.0               | 2.5 x 10 <sup>-5</sup>  |                                               |                                            |
|                                       | Asian                  | 10.5               | 0.21                    |                                               |                                            |
| <b>Gender</b>                         |                        |                    |                         | 2.7%                                          | 0%                                         |
|                                       | Female                 | *                  |                         |                                               |                                            |
|                                       | Male                   | 6.3                | 8.0 x 10 <sup>-4</sup>  |                                               |                                            |
| <b>Creatinine<sup>b</sup> (mg/dl)</b> |                        | -21.4              | 6.6 x 10 <sup>-6</sup>  | 2.4%                                          | 0.4%                                       |
| <b>Age (years)</b>                    |                        | -0.43              | 0.08                    | 0.1%                                          | 0%                                         |
| <b>Treatment<sup>c</sup></b>          |                        |                    |                         | 18.6%                                         | 0%                                         |
|                                       | Total XIII B           | *                  |                         |                                               |                                            |
|                                       | Total XV S/HR          | -19.0              | 3.4 x 10 <sup>-10</sup> |                                               |                                            |
|                                       | Total XV LR            | -7.2               | 5.5 x 10 <sup>-6</sup>  |                                               |                                            |
| <b>Courses</b>                        |                        |                    |                         | 0%                                            | 6.0%                                       |
|                                       | Total XIII B Course 1  | *                  |                         |                                               |                                            |
|                                       | Total XIII B Course 2  | -9.6               | 3.7 x 10 <sup>-5</sup>  |                                               |                                            |
|                                       | Total XIII B Course 3  | 7.1                | 0.003                   |                                               |                                            |
|                                       | Total XIII B Course 4  | 9.0                | 1.0 x 10 <sup>-4</sup>  |                                               |                                            |
|                                       | Total XIII B Course 5  | -2.6               | 0.26                    |                                               |                                            |
|                                       | Total XIII B Course 6  | -4.4               | 0.061                   |                                               |                                            |
|                                       | Total XIII B Course 7  | 4.8                | 0.040                   |                                               |                                            |
|                                       | Total XIII B Course 8  | 5.7                | 0.016                   |                                               |                                            |
|                                       | Total XIII B Course 9  | 7.2                | 0.0023                  |                                               |                                            |
|                                       | Total XIII B Course 10 | 2.5                | 0.30                    |                                               |                                            |
|                                       | Total XV Course 1      | *                  |                         |                                               |                                            |
|                                       | Total XV Course 2      | -10.0              | 7.4 x 10 <sup>-7</sup>  |                                               |                                            |
|                                       | Total XV Course 3      | -10.3              | 1.0 x 10 <sup>-7</sup>  |                                               |                                            |
|                                       | Total XV Course 4      | -9.6               | 2.8 x 10 <sup>-7</sup>  |                                               |                                            |
| <b>SLCO1B1 genotype</b>               |                        |                    |                         | 11.0%                                         | 0%                                         |
|                                       | rs4149081              | -12.4              | 3.6 x 10 <sup>-7</sup>  |                                               |                                            |
|                                       | rs17328763             | 7.6                | 0.061                   |                                               |                                            |
|                                       | rs10841753             | 6.8                | 0.018                   |                                               |                                            |
|                                       | rs2900476              | -3.8               | 0.078                   |                                               |                                            |
|                                       | rs11045818             | -8.6               | 0.065                   |                                               |                                            |

\* Denotes the group used as reference in the multivariate analysis.

<sup>a</sup> Race was assessed as the percentage of an individual's ancestry (percentage European, percentage African and percentage Asian)

<sup>b</sup> The serum creatinine concentration (mg/dl) before each methotrexate course was used as a measure for renal function and included in the multivariate analysis.

<sup>c</sup> The coefficient estimates for the Treatment covariate compare the methotrexate clearance of the first course of the Total XIIIB protocol (reference) to the first methotrexate clearance of the first course of the Total XV Standard/High Risk arm or the first methotrexate clearance of the first course of the Total XV Low Risk arm.



**Supplemental table 7. The *SLCO1B1* gene was most highly associated with methotrexate clearance in a gene-by-gene analysis.**

| Gene Symbol     | No. of SNPs in gene on SNP chip | No. of components used in the model | Discovery Set (n=434) |          |                        | Validation Set (n=206) |        |         |
|-----------------|---------------------------------|-------------------------------------|-----------------------|----------|------------------------|------------------------|--------|---------|
|                 |                                 |                                     | r <sup>2</sup>        | AIC      | P value                | r <sup>2</sup>         | AIC    | P value |
| <i>SLCO1B1</i>  | 27                              | 11                                  | 0.134                 | 3933.786 | < 1 x 10 <sup>-6</sup> | 0.099                  | 1805.7 | 0.024   |
| <i>LOC96597</i> | 3                               | 2                                   | 0.048                 | 3956.899 | 2.3 x 10 <sup>-5</sup> | 0.005                  | 1810.3 | 0.62    |
| <i>MYH6</i>     | 6                               | 4                                   | 0.060                 | 3955.365 | 2.6 x 10 <sup>-5</sup> | 0.015                  | 1812.2 | 0.56    |
| <i>ZNF556</i>   | 3                               | 3                                   | 0.049                 | 3958.512 | 8.1 x 10 <sup>-5</sup> | 0.004                  | 1810.4 | 0.65    |
| <i>TRBV6-6</i>  | 3                               | 1                                   | 0.035                 | 3960.873 | 9.7 x 10 <sup>-5</sup> | <0.001                 | 1809.3 | 0.98    |
| <i>SLCO1A2</i>  | 25                              | 11                                  | 0.082                 | 3959.275 | 1.2 x 10 <sup>-4</sup> | 0.081                  | 1811.9 | 0.12    |
| <i>FOXN2</i>    | 12                              | 5                                   | 0.050                 | 3962.080 | 5.2 x 10 <sup>-4</sup> | 0.046                  | 1807.6 | 0.10    |
| <i>CYB5A</i>    | 22                              | 8                                   | 0.061                 | 3963.119 | 7.9 x 10 <sup>-4</sup> | 0.040                  | 1812.8 | 0.29    |
| <i>IFNA10</i>   | 14                              | 2                                   | 0.031                 | 3964.659 | 0.0012                 | 0.006                  | 1810.1 | 0.56    |

Listed are the top nine genes that were significantly associated with methotrexate clearance in the global gene-level analysis performed in the discovery cohort (n=434) and validation cohort (n=206). Shown is the gene symbol, the number of SNPs for each gene that is represented on the mapping array, the number of components used in the multiple linear regression model, the estimated r-squared value, the Akaike information criterion (AIC) value, and the P value. The

*SLCO1B1* locus had the lowest P value, the highest r-squared value and the lowest AIC among these nine loci. Results were based on  $1 \times 10^6$  permutations using a multiple linear regression analysis.

**Supplemental table 8. *SLCO1B1* SNP genotypes and their association with methotrexate clearance measured during the first course of methotrexate (during consolidation) as the phenotype.**

| dbSNP ID   | Alleles (A/B) | Discovery cohort (n=434) |                         | Validation cohort (n=206) |                         | Combined cohort (n=640)  |                        |
|------------|---------------|--------------------------|-------------------------|---------------------------|-------------------------|--------------------------|------------------------|
|            |               | Coefficient <sup>†</sup> | P value                 | Coefficient <sup>†</sup>  | P value                 | Coefficient <sup>†</sup> | P value                |
| rs11045879 | C/T           | 15.41                    | 4.24 x 10 <sup>-7</sup> | 5.20                      | 0.117165                | 11.95                    | 3.19X 10 <sup>-7</sup> |
| rs4149081  | A/G           | 13.72                    | 1.06 x 10 <sup>-5</sup> | 5.31                      | 0.110054                | 10.76                    | 5.63X 10 <sup>-6</sup> |
| rs10841753 | A/G           | -8.17                    | 0.005663                | -9.95                     | 0.001463                | -8.22                    | 0.000249               |
| rs11045818 | C/T           | -9.34                    | 0.006903                | -14.28                    | 8.90 x 10 <sup>-5</sup> | -10.10                   | 0.000118               |
| rs11045872 | A/G           | 6.53                     | 0.046869                | 8.43                      | 0.01209                 | 6.59                     | 0.007549               |
| rs2900476  | C/T           | 8.13                     | 0.003208                | 1.79                      | 0.542274                | 5.79                     | 0.005616               |
| rs4149076  | C/T           | 6.24                     | 0.015978                | -1.86                     | 0.470871                | 3.60                     | 0.062062               |
| rs17328763 | G/T           | -5.65                    | 0.089194                | -7.72                     | 0.019195                | -5.72                    | 0.020287               |
| rs11045787 | C/T           | -5.41                    | 0.100657                | -7.24                     | 0.028685                | -5.36                    | 0.029183               |
| rs7966613  | A/G           | -6.42                    | 0.012035                | 1.57                      | 0.544463                | -3.87                    | 0.043761               |

<sup>†</sup> The coefficient or effect size represents the decrease (- value) in methotrexate clearance (ml/min/m<sup>2</sup>) for those patients who carry an additional B allele. For instance, methotrexate clearance for patients in the discovery cohort who carry the C allele at the rs11045879 locus will have higher methotrexate clearance (15.41 ml/min/m<sup>2</sup> higher) than those patients that carry the T allele. For each additional C allele, methotrexate clearance will increase on average 15.41 ml/min/m<sup>2</sup>.

**Supplemental table 9. Association of the non-synonymous *SLCO1B1* SNP, T521C, with methotrexate clearance in the discovery, validation and combined patient cohorts.**

| <i>dbSNP ID</i> | <i>Location</i>        | <i>Alleles (A/B)</i> | <i>Discovery cohort (n=387)</i> |                        |                       | <i>Validation cohort (n=102)</i> |                |                      | <i>Combined cohort (n=489)</i> |                        |                        |
|-----------------|------------------------|----------------------|---------------------------------|------------------------|-----------------------|----------------------------------|----------------|----------------------|--------------------------------|------------------------|------------------------|
|                 |                        |                      | <i>MAF</i>                      | <i>P value</i>         | <i>Coefficient†</i>   | <i>MAF</i>                       | <i>P value</i> | <i>Coefficient†</i>  | <i>MAF</i>                     | <i>P value</i>         | <i>Coefficient†</i>    |
| rs4149056       | non-synonymous (V134A) | T/C                  | 0.12                            | 1.9 x 10 <sup>-7</sup> | -14.2<br>(-19.1,-9.3) | 0.13                             | 0.40           | -3.7<br>(-12.4, 3.4) | 0.12                           | 1.2 x 10 <sup>-7</sup> | -12.5<br>(-16.8, -8.4) |

†The coefficient or effect size represents the decrease (- value) in methotrexate clearance (ml/min/m<sup>2</sup>) for those patients who carry an additional C allele. For instance, methotrexate clearance for patients in the combined cohort who carry the C allele at the rs4149056 locus will have lower methotrexate clearance (-12.5 ml/min/m<sup>2</sup> lower) than those patients that carry the T allele. For each additional C allele, methotrexate clearance will decrease on average 12.5 ml/min/m<sup>2</sup>. Confidence intervals are shown in parenthesis.

Supplemental table 10. Results from multivariate analyses in 489 patients with *SLCO1B1* T521C (rs4149056) and 500K SNPCHIP data. Covariates in the multivariate analyses included age, race, sex, methotrexate treatment regimen as well as genotype data for T521C and the top ranked *SLCO1B1* SNP rs11045879. Three separate models were conducted: 1- 2) either rs11045879 or T521C were included in the model individually (top two panels) and 3) both rs11045879 and rs4149056 were allowed to compete in the model simultaneously (bottom two panels). Shown are the coefficients and P values for T521C and rs11045879 SNPs.

| Analysis                                                       | dbSNP ID   | Alleles (A/B) | Coefficient <sup>†</sup> | P value                 |
|----------------------------------------------------------------|------------|---------------|--------------------------|-------------------------|
| T521C and rs11045879 were included in the model individually   | rs11045879 | C/T           | -10.9                    | 4.9 x 10 <sup>-11</sup> |
|                                                                | T521C      | T/C           | -12.8                    | 9.1 x 10 <sup>-9</sup>  |
| T521C and rs11045879 were included in the model simultaneously | rs11045879 | C/T           | -9.8                     | 0.006                   |
|                                                                | T521C      | T/C           | -3.6                     | 0.36                    |

<sup>†</sup> The coefficient or effect size represents the increase (+ value) or decrease (- value) in methotrexate clearance (ml/min/m<sup>2</sup>) for each variable listed. For example, patients with an additional copy of the T allele for rs11045879 will have a lower methotrexate clearance (-10.9 ml/min/m<sup>2</sup> lower) than those patients that carry a C allele. For each additional T allele, methotrexate clearance will decrease on average 10.9 ml/min/m<sup>2</sup>

**Supplemental table 11. Comparison of gene level analysis and single SNP analysis at the *SLCO1B1* locus.** In the combined (discovery plus validation) gene level analysis (n=640), the top 10 components from principal component analysis using the genotypes of 27 SNPs annotated to the *SLCO1B1* gene explained 95.1% genotypic variation at the locus. If we rank the components by the percentage of variation explained, with the first principal component explaining the highest genetic variation, the third component is the component that most significantly correlates with methotrexate clearance ( $P = 1.1 \times 10^{-13}$ ). The loadings (or weights) of each genotype for this component are listed below such that the loading with highest absolute value indicates the genotype at that SNP is contributing most to the component. No other components have a significant association with methotrexate clearance at the  $P < 0.05$  level. A loading value of zero indicates that the particular polymorphism is not contributing to the principal component.

| dbSNP ID   | Loadings/weights for the significant principal component | Listed as significantly associated with methotrexate clearance in Table 1 | Listed as significantly associated with methotrexate clearance in Table 2 |
|------------|----------------------------------------------------------|---------------------------------------------------------------------------|---------------------------------------------------------------------------|
| rs11045879 | -0.54                                                    | Yes                                                                       |                                                                           |
| rs4149081  | -0.54                                                    | Yes                                                                       | Yes                                                                       |
| rs11045872 | 0.4                                                      | Yes                                                                       |                                                                           |
| rs11045818 | -0.27                                                    | Yes                                                                       | Yes                                                                       |
| rs2900476  | 0.22                                                     | Yes                                                                       | Yes                                                                       |
| rs10841753 | 0.21                                                     | Yes                                                                       | Yes                                                                       |
| rs2291075  | -0.15                                                    |                                                                           |                                                                           |
| rs4149076  | -0.13                                                    | Yes                                                                       |                                                                           |
| rs7139376  | -0.13                                                    |                                                                           |                                                                           |
| rs7966613  | -0.12                                                    | Yes                                                                       |                                                                           |
| rs11045808 | 0.07                                                     |                                                                           |                                                                           |
| rs991262   | -0.05                                                    |                                                                           |                                                                           |
| rs11045802 | -0.03                                                    |                                                                           |                                                                           |
| rs1463565  | 0.01                                                     |                                                                           |                                                                           |
| rs999278   | 0.01                                                     |                                                                           |                                                                           |
| rs2291076  | -0.02                                                    |                                                                           |                                                                           |
| rs4149069  | -0.01                                                    |                                                                           |                                                                           |
| rs852549   | -0.01                                                    |                                                                           |                                                                           |

|            |   |     |     |
|------------|---|-----|-----|
| rs4149014  | 0 |     |     |
| rs2417955  | 0 |     |     |
| rs17328763 | 0 | Yes | Yes |
| rs11045787 | 0 | Yes |     |
| rs7973095  | 0 |     |     |
| rs11045819 | 0 |     |     |
| rs11045776 | 0 |     |     |
| rs11045825 | 0 |     |     |
| rs7137959  | 0 |     |     |

**Supplemental figure 1. Average methotrexate clearance significantly differed among treatment regimens.** Patients in the discovery cohort were treated on St. Jude Children's Research Hospital Total XIII B (n= 213) and Total XV Low Risk (n=114) or Total XV Standard/High (n = 107) risk ALL protocols. Shown are quartiles, the minimum and maximum range of methotrexate clearance, outliers (open circles) and the mean value of methotrexate clearance (closed triangles). P values were generated using analysis of variance (ANOVA).

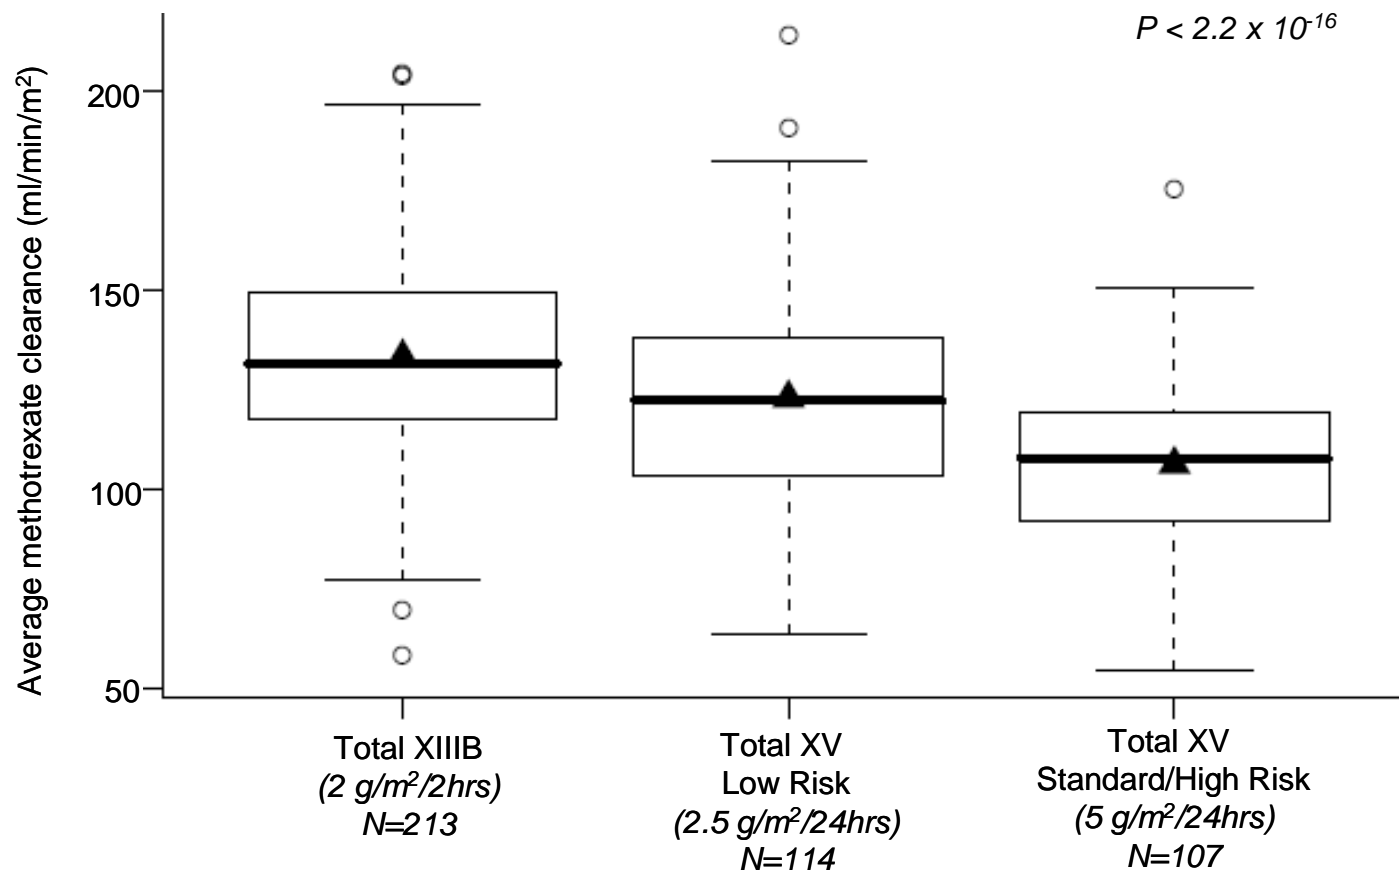



**Supplemental figure 2. Average methotrexate clearance significantly differed among racial groups in the discovery cohort.** Racial groups in the discovery cohort included Asian patients (n=5), African American patients (n=73), those designated as “Other” (n=41), and Caucasian patients (n=315). Patients were assigned to racial groups (Asian, African-American, and Caucasian) if they had >90% of the respective ancestry genotypes. Shown are quartiles, the minimum and maximum range of methotrexate clearance, outliers (open circles), and the mean value of methotrexate clearance (closed triangles). P values were generated using analysis of variance (ANOVA).

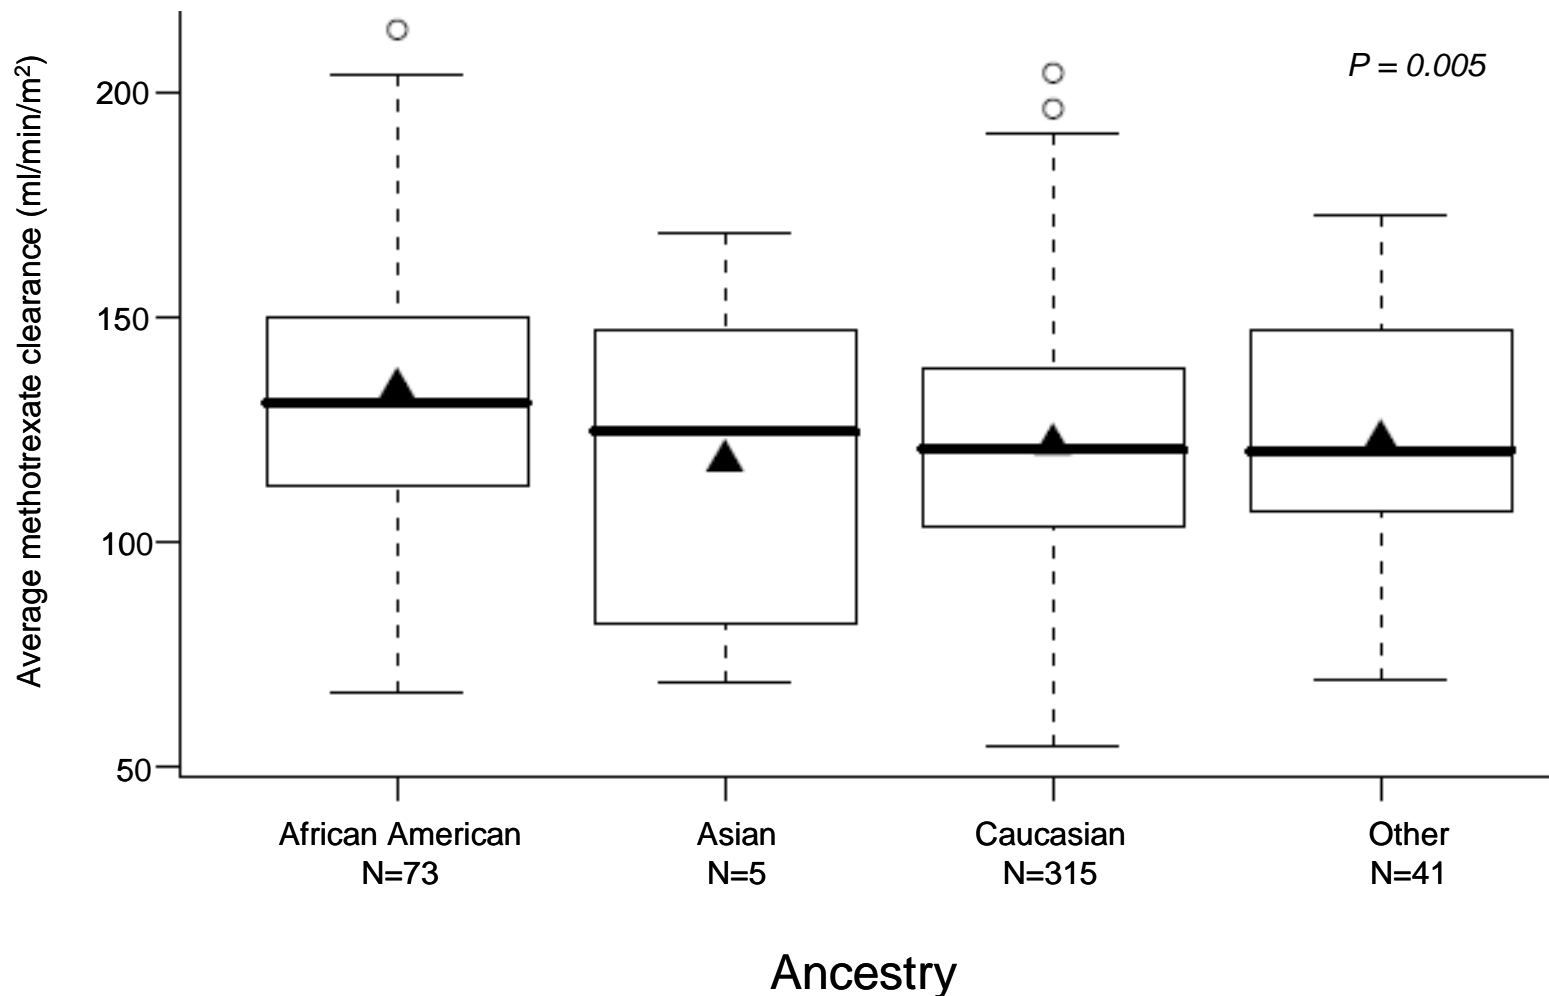

Supplemental figure 3. Average methotrexate clearance decreased with increasing age in the discovery cohort.

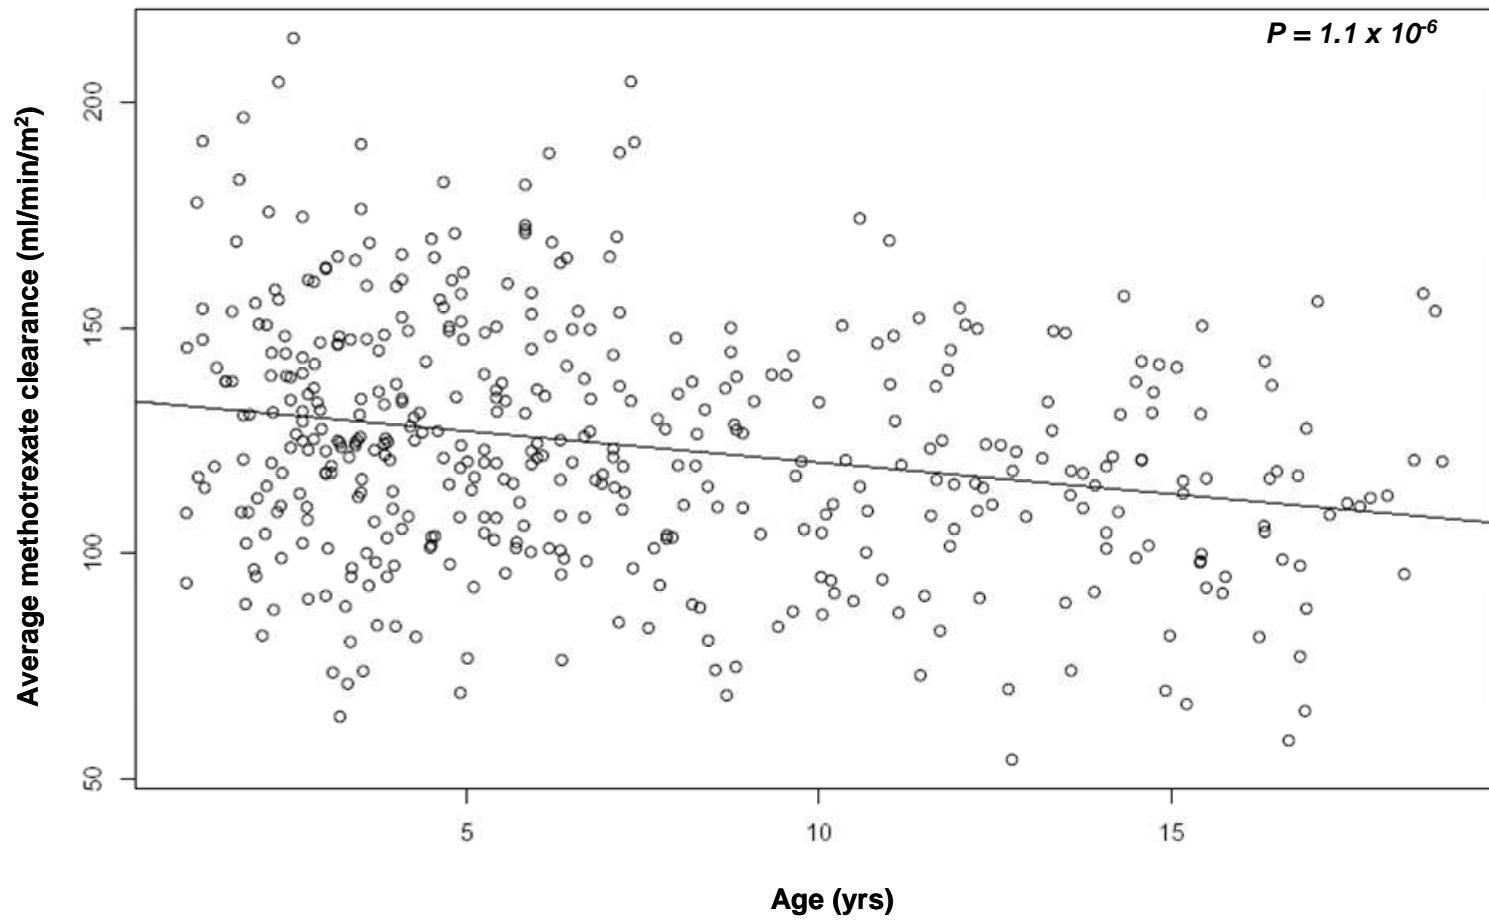

**Supplemental figure 4A. Linkage disequilibrium ( $r^2$  squared) structure among *SLCO1B1* SNPs in the discovery cohort.** Genotype data are from 285 patients of Caucasian ancestry from the study population. Shown are 27 *SLCO1B1* SNPs that were typed on the 500K Mapping Array sets plus rs4149056 (blue box, T521C). Boxed in red are the SNPs that were significantly ( $P < 0.05$ ) associated with methotrexate clearance in the discovery cohort ( $n=434$ ) (Table 1). There were 5 distinct linkage disequilibrium (LD) blocks within the region indicated that were generated using the Haploview software. Linkage disequilibrium ( $r^2$  squared) between SNPs increases from the color white ( $r^2=0$ ; no evidence of LD), to shades of grey ( $0 < r^2 < 1$ ), to the color black ( $r^2=1$ ; strong evidence of LD).

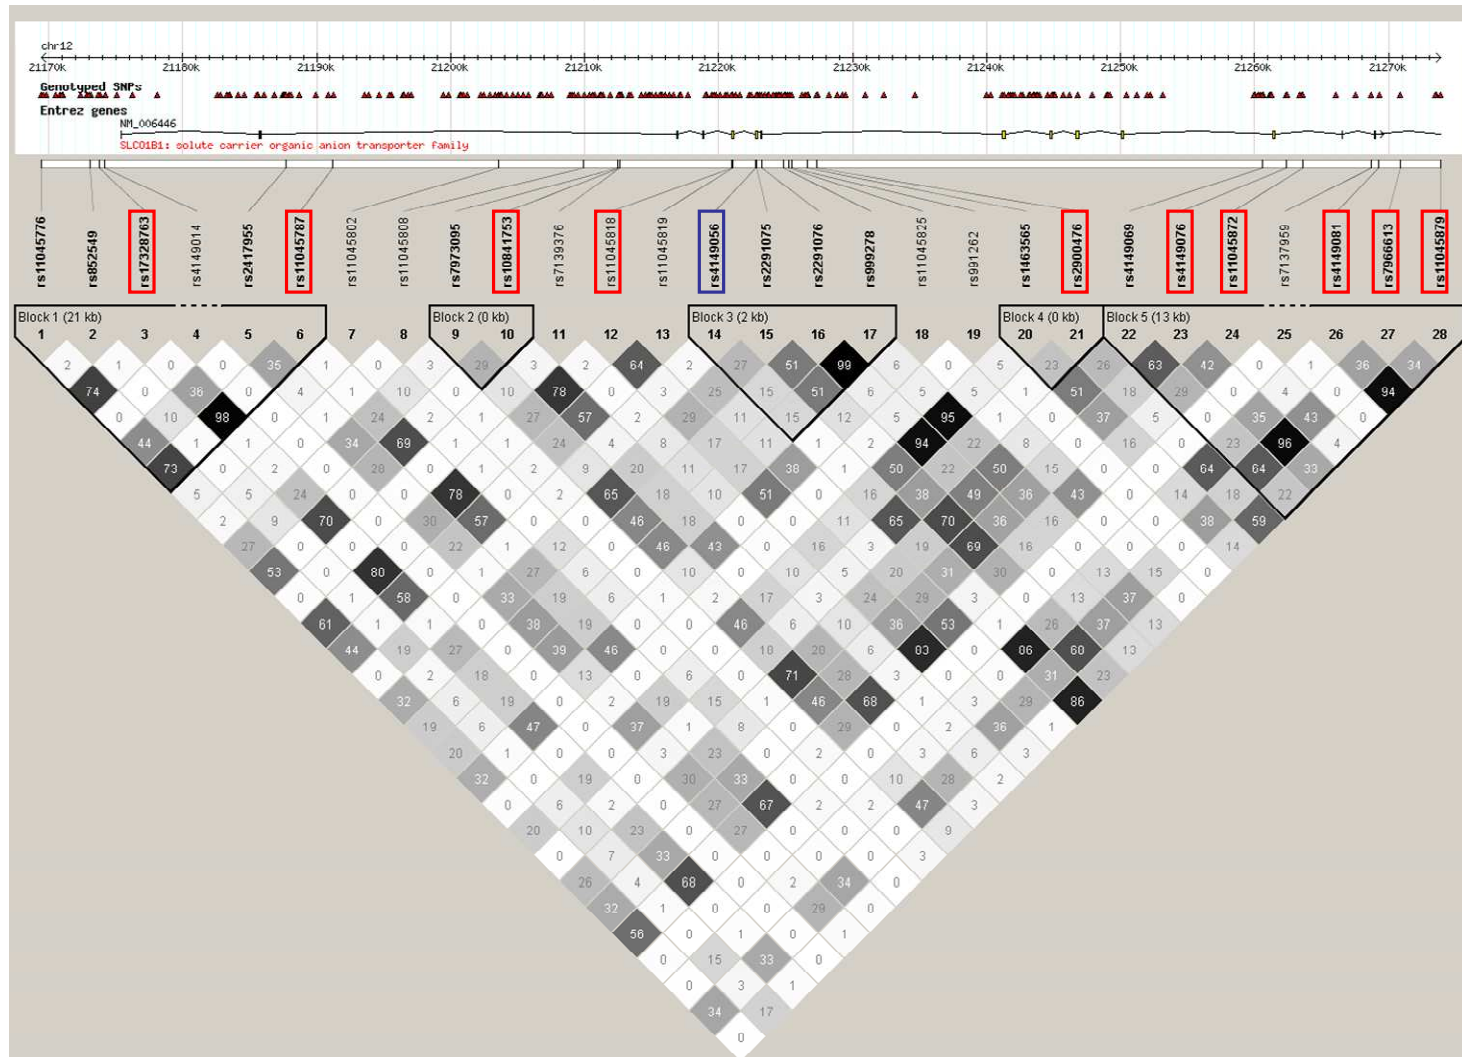

**Supplemental figure 4B. Linkage disequilibrium ( $r^2$  squared) structure among *SLCO1B1* SNPs in the validation cohort.** Genotype data are from 145 patients of Caucasian ancestry from the validation cohort. Shown are 27 *SLCO1B1* SNPs that were typed on the 500K Mapping Array set plus rs4149056 (blue box, T521C). Boxed in red are the SNPs that were significantly ( $P < 0.05$ ) associated with methotrexate clearance in the validation cohort ( $n=206$ ) (Table 1). There were 4 distinct linkage disequilibrium (LD) blocks within the region indicated that were generated using the Haploview software. Linkage disequilibrium ( $r^2$  squared) between SNPs increases from the color white ( $r^2=0$ ; no evidence of LD), to shades of grey ( $0 < r^2 < 1$ ), to the color black ( $r^2=1$ ; strong evidence of LD).

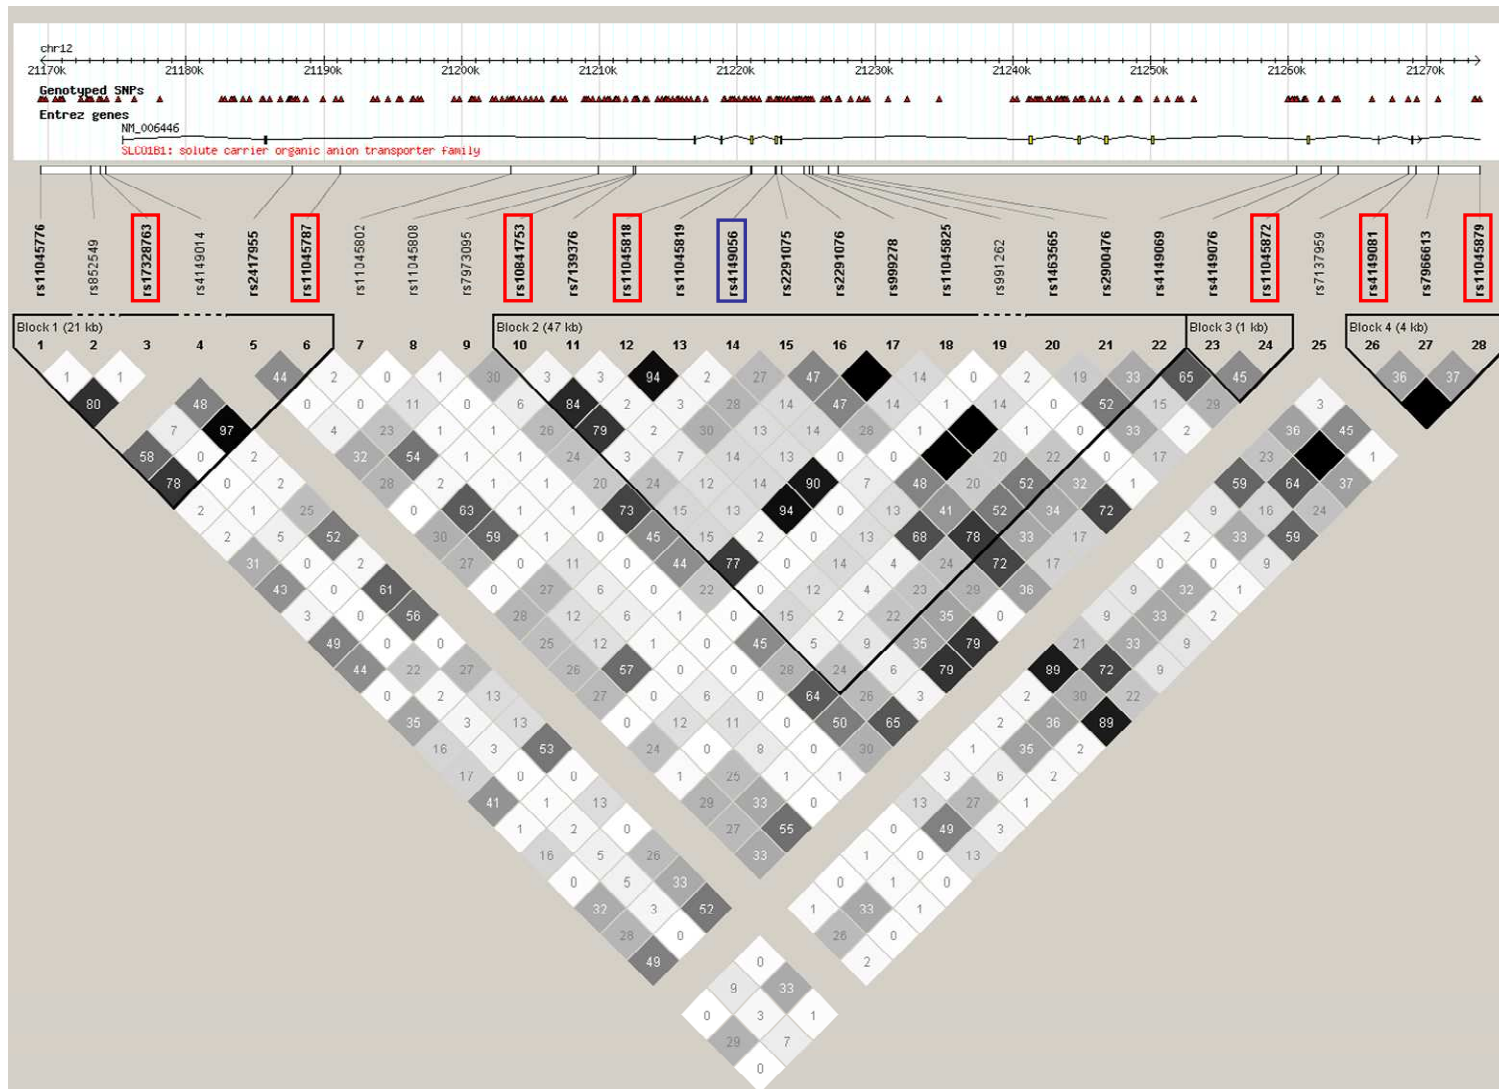

**Supplemental figure 5. Genome-wide P values showing the association of single nucleotide polymorphisms (SNPs) with methotrexate clearance in the combined (discovery plus validation) cohort of 640 children with acute lymphoblastic leukemia.** Shown is the distribution of P values (as  $-\log_{10}$  values) for the association of 398,699 SNP genotypes with methotrexate clearance in the combined cohort. Highlighted is the P value for the most significant association identified between a single SNP (located in *SLCO1B1* on chromosome 12) and methotrexate clearance.

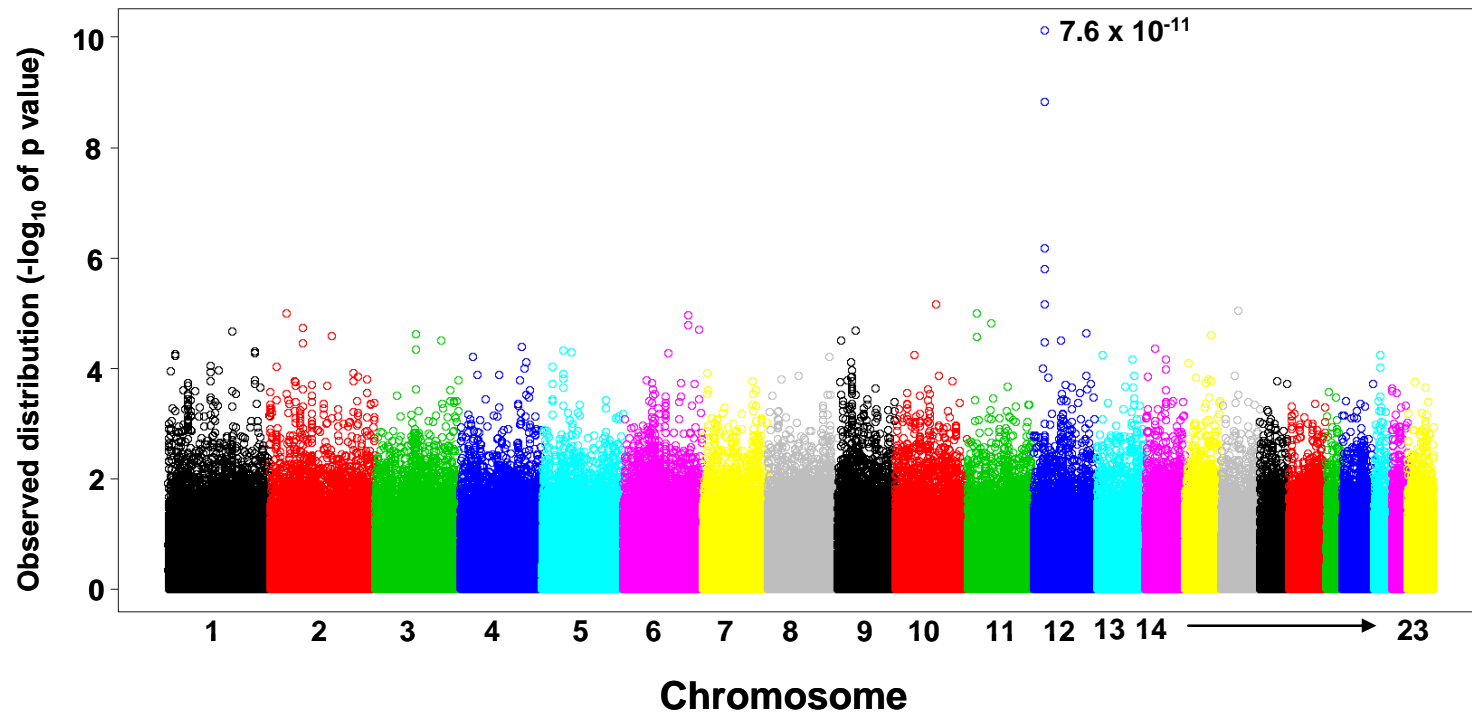

**Supplemental figure 6. Association between the non-synonymous *SLCO1B1* SNP, T521C, and the occurrence of gastrointestinal toxicity during the consolidation phase of treatment during St. Jude's Total XIII B ALL protocol.** The bar graph below displays the percentage of patients (plotted on the y-axis) per genotype (plotted on the x-axis) that suffered grade 3 to 4 gastrointestinal toxicity. Numbers above each bar represent the numbers of patients that did vs. did not suffer toxicity for the specified genotype.

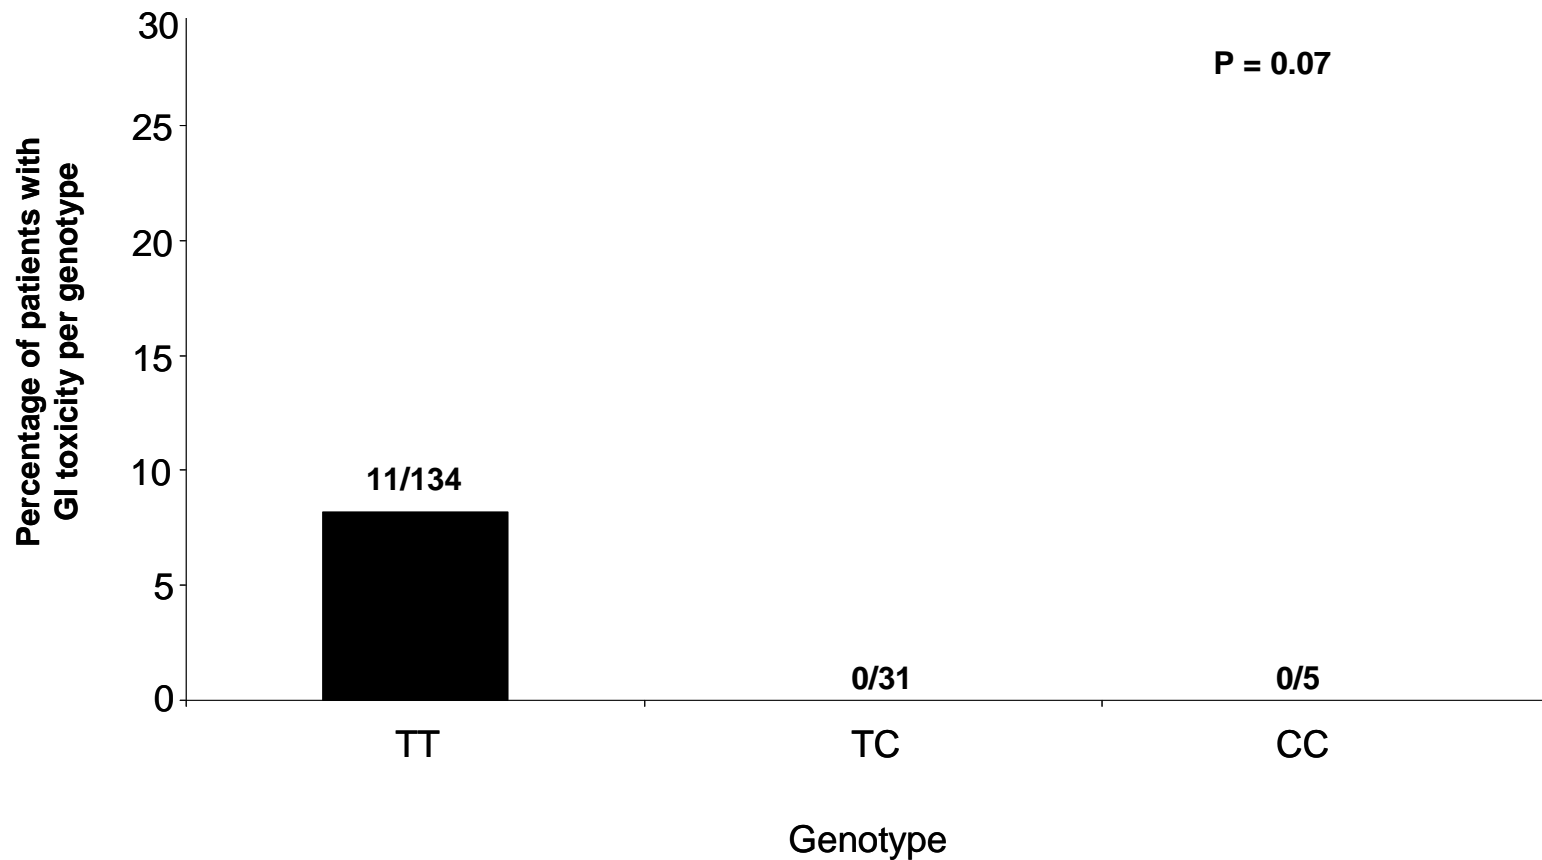

## References

1. Price,AL, Patterson, Plenge et al : Principal components analysis corrects for stratification in genome-wide association studies. Nat Genet. 38:904-909, 2006
